# Supplementary material
Source: PubMed Central journal article supplement (PMC6022546)
Supplement: awy146_suppl_data.pdf [file awy146_suppl_data.pdf]

## Supplemental material

**Supplemental Table 1.** Group differences by age of death, sex, and ApoE status

**Supplemental Table 2.** Clinical diagnoses by neurodegenerative disease group

**Supplemental Table 3.** CPC associations with co-pathology

**Supplemental Table 1.** Group differences by age of death, sex, and ApoE status

| Group       | Age at death |     |         | Sex   |         | APOE $\epsilon 4$ |         | APOE $\epsilon 2$ |         |
|-------------|--------------|-----|---------|-------|---------|-------------------|---------|-------------------|---------|
|             | t-stat       | df  | p-value | x2    | p-value | x2                | p-value | x2                | p-value |
| <i>iAD</i>  | -5.08        | 104 | <0.001  | 0.00  | 0.962   | 2.08              | 0.124   | 19.24             | 0.003   |
| <i>hAD</i>  | -3.6         | 113 | <0.001  | 2.65  | 0.102   | 118.33            | <0.001  | 383.98            | <0.001  |
| <b>CBD</b>  | 2.19         | 66  | 0.016   | 3.18  | 0.083   | 4.87              | 0.085   | 1.88              | 0.230   |
| <b>PiD</b>  | 0.80         | 20  | 0.215   | 0.23  | 0.641   | 2.44              | 0.223   | 4.05              | 0.139   |
| <b>PSP</b>  | -3.46        | 120 | <0.001  | 1.67  | 0.210   | 4.36              | 0.079   | 0.82              | 0.395   |
| <b>ALS</b>  | 3.36         | 135 | 0.001   | 2.96  | 0.094   | 4.37              | 0.061   | 30.20             | <0.001  |
| <b>FTD</b>  | 0.37         | 125 | 0.356   | 0.04  | 0.850   | 3.02              | 0.125   | 6.07              | 0.040   |
| <i>hFTD</i> | 2.04         | 50  | 0.023   | 0.38  | 0.547   | 0.06              | 0.810   | 4.19              | 0.105   |
| <b>MSA</b>  | 1.65         | 59  | 0.053   | 0.62  | 0.441   | 0.40              | 0.569   | 19.89             | 0.010   |
| <i>bLBD</i> | -2.55        | 53  | 0.007   | 4.70  | 0.060   | 0.28              | 0.582   | 1.51              | 0.287   |
| <i>lLBD</i> | -5.50        | 106 | <0.001  | 24.16 | <0.001  | 1.92              | 0.217   | 15.64             | 0.008   |
| <i>nLBD</i> | -3.54        | 122 | <0.001  | 17.00 | <0.001  | 13.54             | <0.001  | 169.22            | <0.001  |

**Supplemental Table 2.** Clinical diagnoses by neurodegenerative disease group

| Clinical/Group                             | MPG      | <i>i</i> AD          | <i>h</i> AD | PiD      | CBD       | PSP      | ALS       | FTLD<br>-TDP | <i>h</i> TDP | MSA       | <i>b</i> LBD | <i>l</i> LBD | <i>n</i> LBD |
|--------------------------------------------|----------|----------------------|-------------|----------|-----------|----------|-----------|--------------|--------------|-----------|--------------|--------------|--------------|
| <b>Alzheimer's disease</b>                 |          |                      |             |          |           |          |           |              |              |           |              |              |              |
| <i>Possible</i>                            |          | <b>2<sup>1</sup></b> | <b>10</b>   |          |           |          |           | <b>2</b>     |              |           | <b>1</b>     |              | <b>4</b>     |
| <i>Probable</i>                            |          | <b>15</b>            | <b>107</b>  | <b>0</b> | <b>1</b>  | <b>1</b> | <b>1</b>  | <b>6</b>     |              |           |              |              | <b>5</b>     |
| <b>Amyotrophic lateral sclerosis</b>       |          |                      |             |          |           |          |           |              |              |           |              |              |              |
| <i>Suspected</i>                           |          |                      |             |          |           | <b>1</b> | <b>3</b>  |              |              |           |              |              |              |
| <i>Possible</i>                            |          |                      |             |          |           |          | <b>5</b>  |              |              |           |              |              |              |
| <i>Probable</i>                            |          |                      |             |          |           |          | <b>10</b> |              |              |           |              |              |              |
| <i>Definite</i>                            |          |                      |             |          |           |          | <b>71</b> |              | <b>8</b>     |           |              |              |              |
| <i>with MCI</i>                            |          |                      |             |          |           |          | <b>3</b>  |              | <b>1</b>     |           |              |              |              |
| <i>with FTD</i>                            |          |                      |             |          |           |          | <b>5</b>  | <b>1</b>     | <b>5</b>     |           |              |              |              |
| <b>Cerebrovascular disease<sup>2</sup></b> |          |                      | <b>2</b>    |          |           |          |           |              | <b>1</b>     | <b>2</b>  |              |              |              |
| <b>Cognitive impairment<sup>3</sup></b>    | <b>1</b> | <b>2</b>             | <b>9</b>    |          |           |          |           |              |              |           | <b>1</b>     |              |              |
| <b>Corticobasal syndrome</b>               | <b>1</b> | <b>1</b>             | <b>13</b>   | <b>1</b> | <b>11</b> | <b>4</b> |           | <b>3</b>     | <b>2</b>     |           |              |              | <b>3</b>     |
| <b>Dementia NOS</b>                        |          |                      | <b>2</b>    |          |           | <b>1</b> |           | <b>1</b>     |              |           |              |              | <b>1</b>     |
| <b>Dementia with Lewy bodies</b>           |          | <b>3</b>             | <b>11</b>   |          | <b>1</b>  | <b>2</b> |           |              |              |           | <b>1</b>     | <b>3</b>     | <b>18</b>    |
| <b>Frontotemporal degeneration</b>         |          |                      |             |          |           |          |           |              |              |           |              |              |              |
| <i>bvFTD</i>                               | <b>1</b> |                      | <b>5</b>    | <b>7</b> | <b>2</b>  | <b>3</b> |           | <b>17</b>    | <b>5</b>     |           |              |              |              |
| <b>NOS<sup>4</sup></b>                     | <b>1</b> | <b>1</b>             | <b>6</b>    | <b>5</b> | <b>2</b>  |          |           | <b>10</b>    | <b>2</b>     |           |              |              |              |
| <i>PPA (Logopenic)</i>                     |          | <b>3</b>             | <b>9</b>    |          | <b>1</b>  |          |           | <b>2</b>     |              | <b>1</b>  |              |              |              |
| <i>PPA (NOS)</i>                           |          |                      | <b>1</b>    |          |           | <b>1</b> |           | <b>1</b>     |              |           |              |              |              |
| <i>PPA (PNFA)</i>                          |          |                      | <b>4</b>    |          | <b>4</b>  | <b>1</b> |           | <b>3</b>     |              |           |              |              |              |
| <i>PPA (SD)</i>                            |          |                      | <b>3</b>    | <b>1</b> |           |          |           | <b>8</b>     |              |           |              |              | <b>1</b>     |
| <b>Motor neuron disease<sup>5</sup></b>    |          | <b>1</b>             |             |          |           |          | <b>4</b>  |              |              |           |              |              |              |
| <b>Multiple system atrophy</b>             |          |                      |             |          |           | <b>1</b> |           | <b>1</b>     |              | <b>17</b> | <b>1</b>     | <b>1</b>     | <b>1</b>     |

|                                       |           |     |          |     |     |           |     |     |     |          |           |           |     |
|---------------------------------------|-----------|-----|----------|-----|-----|-----------|-----|-----|-----|----------|-----------|-----------|-----|
| <b>No impairment<sup>6</sup></b>      | <b>64</b> | 5   | 2        |     |     |           |     |     |     |          | 2         |           |     |
| <b>Parkinson's disease</b>            |           |     |          |     |     |           |     |     |     |          |           |           |     |
| <i>PD</i>                             | 1         | 5   | 1        |     |     | 1         | 1   |     | 4   | <b>5</b> | <b>13</b> | <b>7</b>  |     |
| <i>PD/MCI</i>                         |           |     |          |     |     | 1         |     |     |     | <b>4</b> | <b>2</b>  | <b>1</b>  |     |
| <i>PDD</i>                            |           | 4   | 3        |     |     | 1         |     |     | 1   | 5        | <b>18</b> | <b>38</b> |     |
| <b>Posterior cortical atrophy</b>     |           |     | <b>3</b> |     |     |           |     |     |     |          |           |           | 1   |
| <b>Progressive supranuclear palsy</b> |           |     |          |     | 7   | <b>32</b> |     |     | 1   | 1        |           |           | 1   |
| <b>Schizophrenia</b>                  |           |     | 3        |     |     |           |     |     |     |          |           |           |     |
| <b>Rare<sup>7</sup></b>               | 3         | 1   | 2        |     |     |           | 2   |     |     |          |           |           |     |
| <b>Clinical unavailable</b>           |           | 3   | 5        | 1   |     | 1         | 5   |     |     |          |           |           |     |
| <b>Total</b>                          | 72        | 46  | 201      | 15  | 29  | 51        | 108 | 55  | 25  | 26       | 20        | 37        | 81  |
| <b>CPC specificity (n)</b>            | 64        | 17  | 119      | 13  | 11  | 32        | 101 | 42  | 21  | 17       | 9         | 36        | 64  |
| <b>CPC specificity (%)</b>            | 89%       | 37% | 59%      | 87% | 38% | 63%       | 92% | 76% | 84% | 65%      | 45%       | 97%       | 79% |

<sup>1</sup> Cases highlighted in bold have a strong clinicopathological correlation.

<sup>2</sup> includes vascular dementia.

<sup>3</sup> includes amnesic and non-amnesic mild cognitive impairment.

<sup>4</sup> includes both FTLN-NOS and FTD-NOS.

<sup>5</sup> includes primary lateral sclerosis and progressive muscular atrophy.

<sup>6</sup> No cognitive or motor impairments.

<sup>7</sup> includes bipolar disease, depression, dystonia, hydrocephalus and other rare diagnoses of n<3.

**Supplemental Table 3. CPC associations with co-pathology**

| <b>Group</b> | <b>OR<sup>1</sup></b> | <b>95% CI</b> |         | <b>p-value</b> |
|--------------|-----------------------|---------------|---------|----------------|
| MPG          | 2.47                  | 0.47          | 12.90   | 0.28           |
| <i>i</i> AD  | 0.68                  | 0.19          | 2.45    | 0.55           |
| <i>h</i> AD  | 1.00                  | 0.53          | 1.90    | 0.99           |
| PiD          | 0.39                  | 0.01          | 14.82   | 0.61           |
| CBD          | 0.28                  | 0.04          | 1.94    | 0.20           |
| PSP          | 0.20                  | 0.04          | 1.06    | 0.06           |
| ALS          | 0.64                  | 0.03          | 12.80   | 0.77           |
| FTD-TDP      | 0.68                  | 0.16          | 2.91    | 0.60           |
| <i>h</i> TDP | 7.28                  | 0.38          | 141.27  | 0.19           |
| MSA          | 1.94                  | 0.22          | 16.96   | 0.55           |
| <i>b</i> LBD | 0.37                  | 0.03          | 5.10    | 0.45           |
| <i>l</i> LBD | 0.00                  | 0.00          | -       | 0.98           |
| <i>n</i> LBD | 0.00                  | 0.00          | 2.8E202 | 0.96           |

<sup>1</sup> Predictor is CPC specificity and covariates are gender and age.
